# Supplementary material for: Effect of exercise training on liver function in adults who are overweight or exhibit fatty liver disease: a systematic review and meta-analysis
Source: PubMed Central journal article supplement — Br J Sports Med. 2016 Jun 17;52(13):834–43. doi: 10.1136/bjsports-2016-096197 (PMC6029644; doi:10.1136/bjsports-2016-096197), 2016-06-17
Supplement: bjsports-2016-096197supp001.pdf [file bjsports-2016-096197supp001.pdf]

# Supplementary Files

Figure S1.

## PubMed Search Strategy

### Pub Med Search Strategy Terms

#11 Search (Exercise/Broad[filter]) AND (#10)

#10 Search #8 OR #9

#9 Search #1 OR #2 OR #3 OR #4 OR #5 OR #6 OR #7 OR #8

#8 Search (((exercise[MeSH Terms]) OR exercise therapy [MeSH Terms]) OR aerobic exercise[Text Word]) OR exercise training[Text Word] OR resistance training [Text Word] OR Weight lifting [Text word] OR Strength Endurance [Text Word] OR Fitness [Text Word] OR Cardiovascular training [Text Word] OR Walk\* [Text Word] OR Exertion [Text Word] OR Muscular exercise [Text Word] OR Polestriding [Text Word] OR Plantar Flexion [Text Word]

#7 Search ((physical activity [MeSH Terms]) OR physical training [Text Word])

#6 Search (((lifestyle therapy [MeSH Terms]) OR exercise training [Text Word])

#5 Search (((obese [MeSH Terms]) OR exercise training [Text Word])

#4 Search (((overweight [MeSH Terms]) OR exercise training [Text Word])

#3 Search (((non-alcoholic steatohepatitis [MeSH Terms]) OR exercise training [Text Word])

#2 Search (((non-alcoholic fatty liver disease [MeSH Terms]) OR exercise training [Text Word])

#1 Search (((fatty liver disease [MeSH Terms]) OR exercise training [Text Word])

## Funnel Plots to Examine Publication Bias

Figure S2. Change in Interhepatic Fat in Exercise Studies with >10,000 Kcal Total Energy Expenditure.

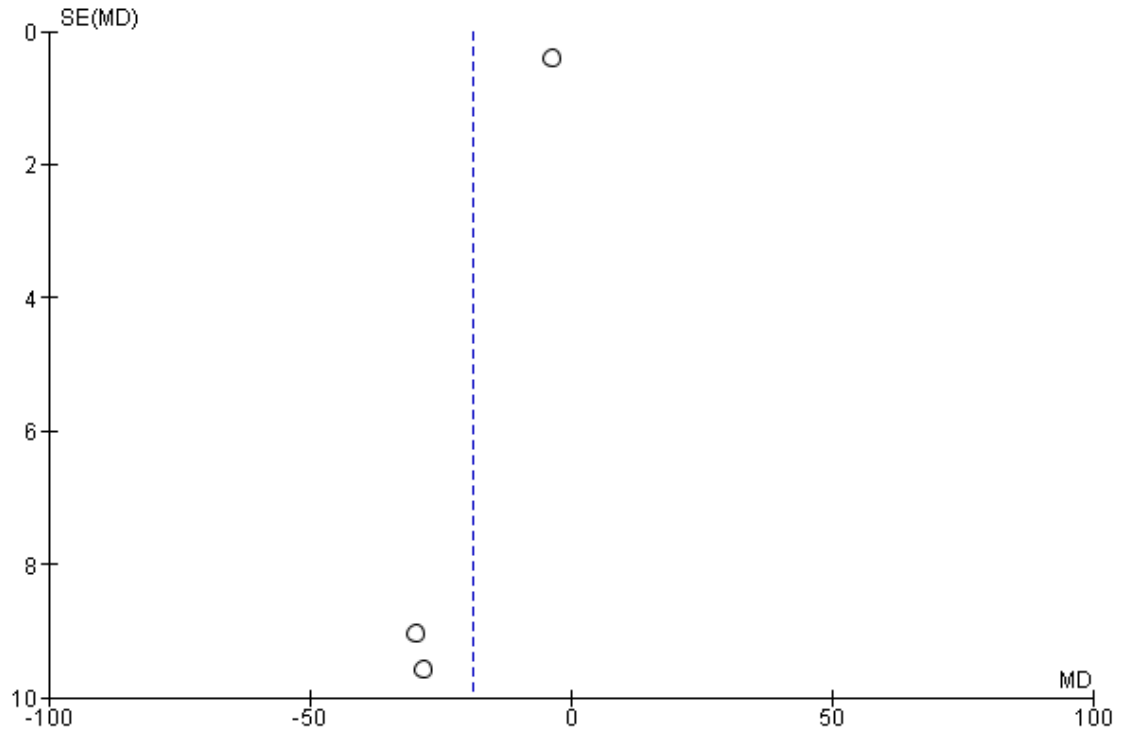

Figure S3. Change BMI in Exercise Studies Only

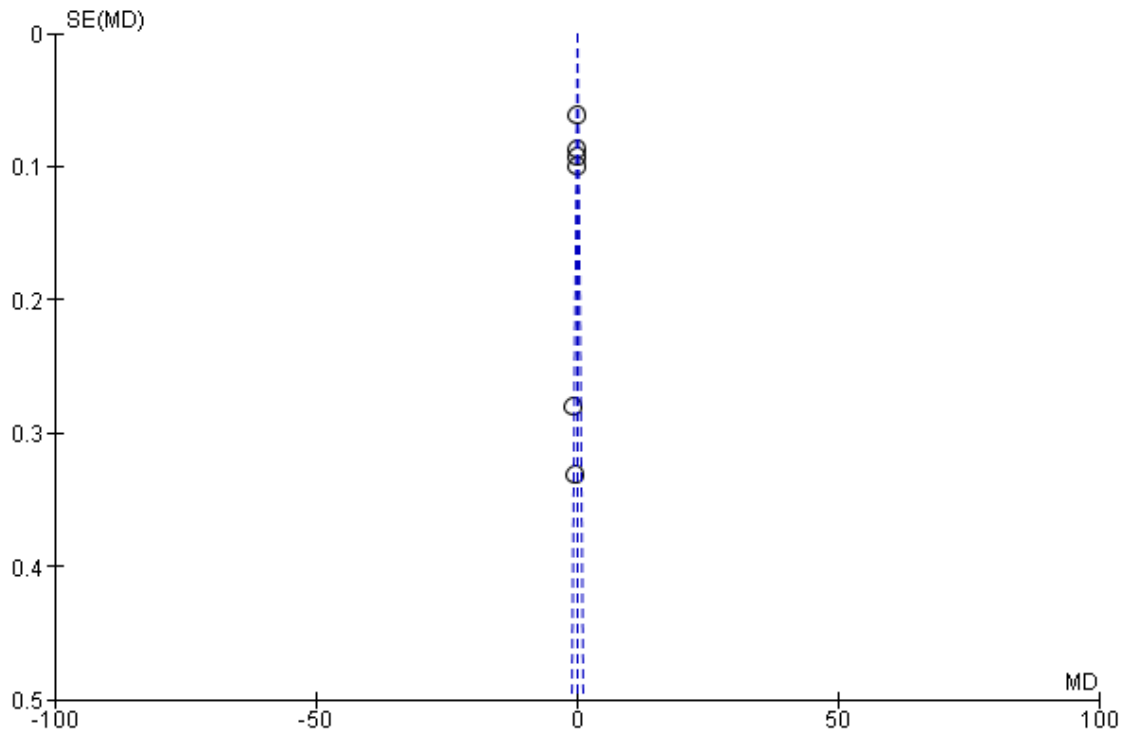

Figure S4. Change in FFA in Exercise Studies Only

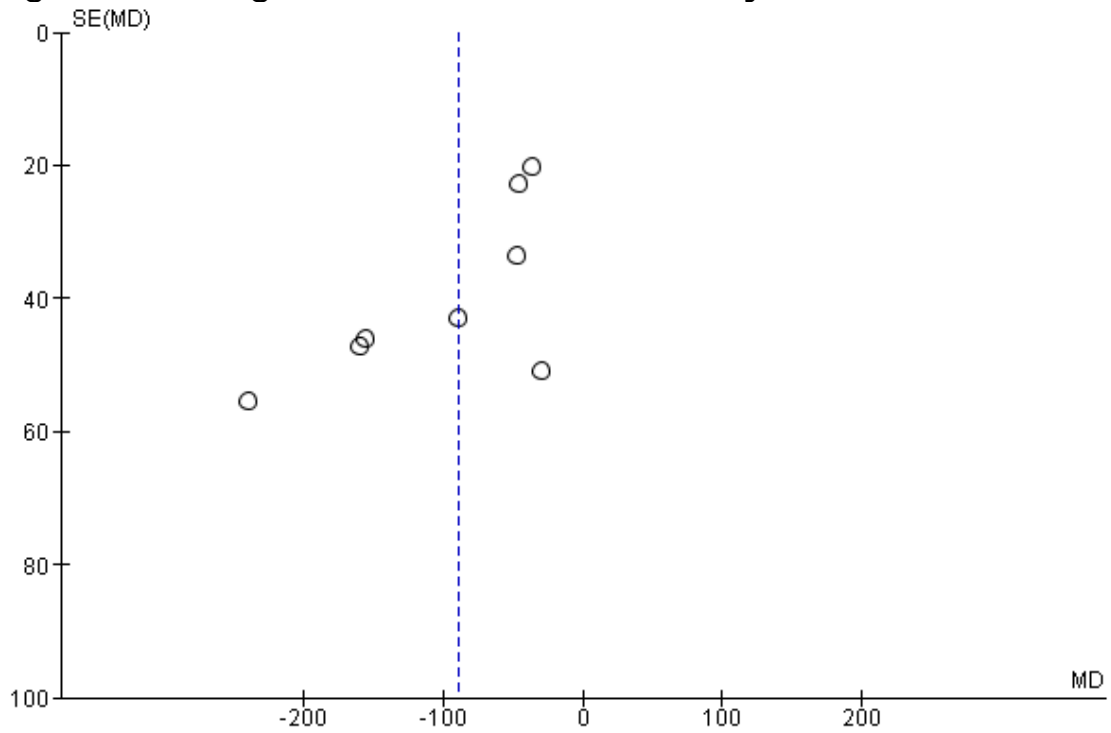

Figure S5. Change in GGT in Exercise Studies Only

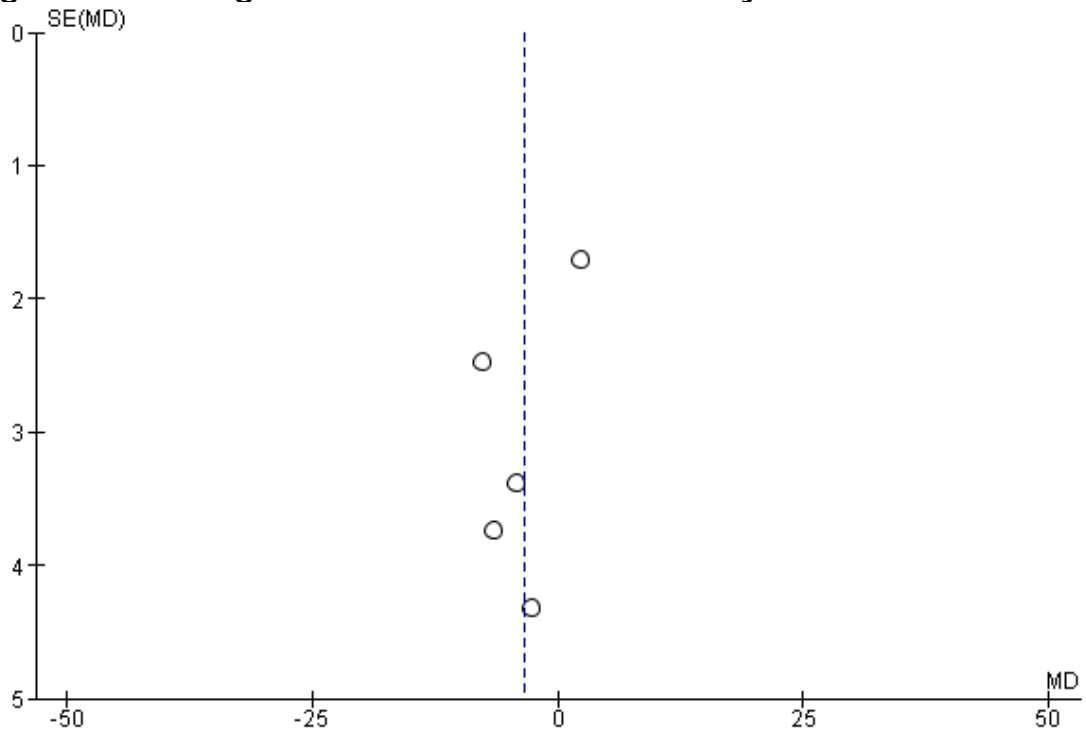

Figure S6 Change in Insulin in Exercise Studies Only

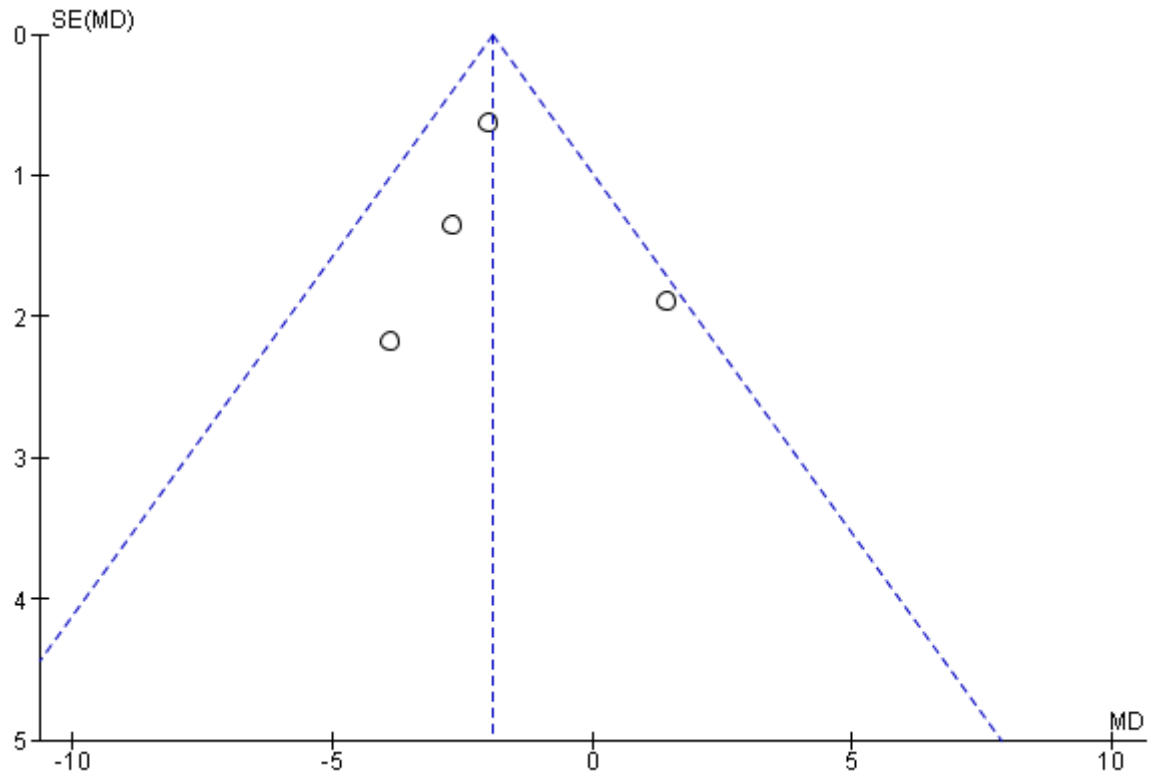

Figure S7. Change in Total Cholesterol in Exercise Studies Only

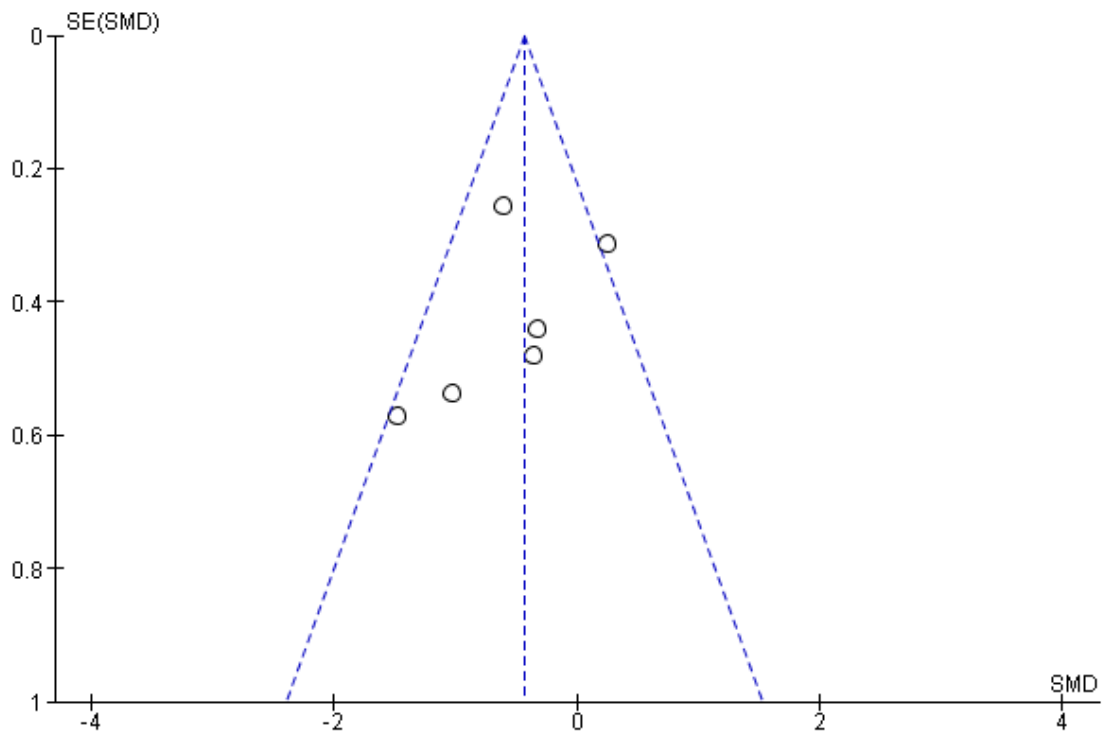

**Table S1. Excluded Randomized Controlled Trials**

| <b>Excluded RCTs</b> | <b>Reason for Exclusion</b> |
|----------------------|-----------------------------|
| Barsalani 2013       | Unmatched control group     |
| Chen 2008            | Non randomized study        |
| De Piano 2012        | Participants <18 years      |
| Haus 2010            | Unmatched diet groups       |
| Lazo 2010            | Lifestyle advice study      |
| Lee 2012             | Participants <18 years      |
| Oh 2014              | Non randomized study        |
| Pugh 2013            | NAFLD vs Healthy Controls   |
| Pugh 2014            | NAFLD vs Healthy Controls   |
| Sanchez-Munoz 2013   | Exercise vs Metformin Study |
| St George 2009       | Counselling intervention    |
| Tsekouras 2008       | Healthy population          |
